# Supplementary material for: Magnetic imaging under high pressure with a spin-based quantum sensor integrated in a van der Waals heterostructure
Source: Springer Nature journal article supplement (doi:10.1038/s41467-025-63580-2), 2025-09-29
Supplement: MOESM1 [file 41467_2025_63580_MOESM1_ESM.pdf]

**Supplementary Information:**

**Magnetic imaging under high pressure with a spin-based  
quantum sensor integrated in a van der Waals heterostructure**

Z. Mu,<sup>1</sup> J. Fraunié,<sup>2</sup> A. Durand,<sup>1</sup> S. Clément,<sup>1</sup> A. Finco,<sup>1</sup> J. Rouquette,<sup>3</sup>  
A. Hadj-Azzem,<sup>4</sup> N. Rougemaille,<sup>4</sup> J. Coraux,<sup>4</sup> J. Li,<sup>5</sup> T. Poirier,<sup>5</sup> J. H. Edgar,<sup>5</sup> I.  
C. Gerber,<sup>2</sup> X. Marie,<sup>2</sup> B. Gil,<sup>1</sup> G. Cassaboïs,<sup>1,6</sup> C. Robert,<sup>2</sup> and V. Jacques<sup>1</sup>

<sup>1</sup>*Laboratoire Charles Coulomb, Université de  
Montpellier and CNRS, 34095 Montpellier, France*

<sup>2</sup>*Université de Toulouse, INSA-CNRS-UPS, LPCNO,  
135 Avenue Rangueil, 31077 Toulouse, France*

<sup>3</sup>*Institut Charles Gerhardt, Université de Montpellier  
and CNRS, 34095 Montpellier Cedex, France*

<sup>4</sup>*Univ. Grenoble Alpes, CNRS, Grenoble INP,  
Institut NEEL, 38000 Grenoble, France*

<sup>5</sup>*Tim Taylor Department of Chemical Engineering,  
Kansas State University, Kansas 66506, USA*

<sup>6</sup>*Institut Universitaire de France, 75231 Paris, France*

## Supplementary Note 1

All magnetic imaging experiments (Fig. 4 and Fig. 5) were performed with a bias magnetic field  $B_b = 8$  mT applied along the  $z$ -axis in order to split the electron spin resonance of the  $V_B^-$  centers via the Zeeman effect. We then measured the frequency  $\nu_-$  of the lower electron spin resonance at each point of the scan. Taking into account the orthorhombic zero-field splitting parameter  $E$ , this frequency is given by

$$\nu_- = D(P) - \sqrt{E^2 + \gamma_e^2(B_b + B_z)^2}, \quad (1)$$

where  $\gamma_e = 28$  GHz/T and  $B_z$  is the magnetic field produced by the CrTe<sub>2</sub> flake along the  $z$  direction, which is in the mT range in our experiments. For the hBN sensing layer used for magnetic imaging under pressure, the orthorhombic zero-field splitting parameter is  $E = 60(2)$  MHz (see Supplementary Figure 3). The Zeeman term is therefore always much larger than the  $E$  parameter in magnetic imaging experiments and we can thus make the approximation  $\sqrt{E^2 + \gamma_e^2(B_b + B_z)^2} \sim \gamma_e(B_b + B_z)$ . The relative error ( $\sim 3\%$ ) introduced by this approximation in the magnetic field estimation is much smaller than that resulting from the pixel-to-pixel noise of the magnetic field images.

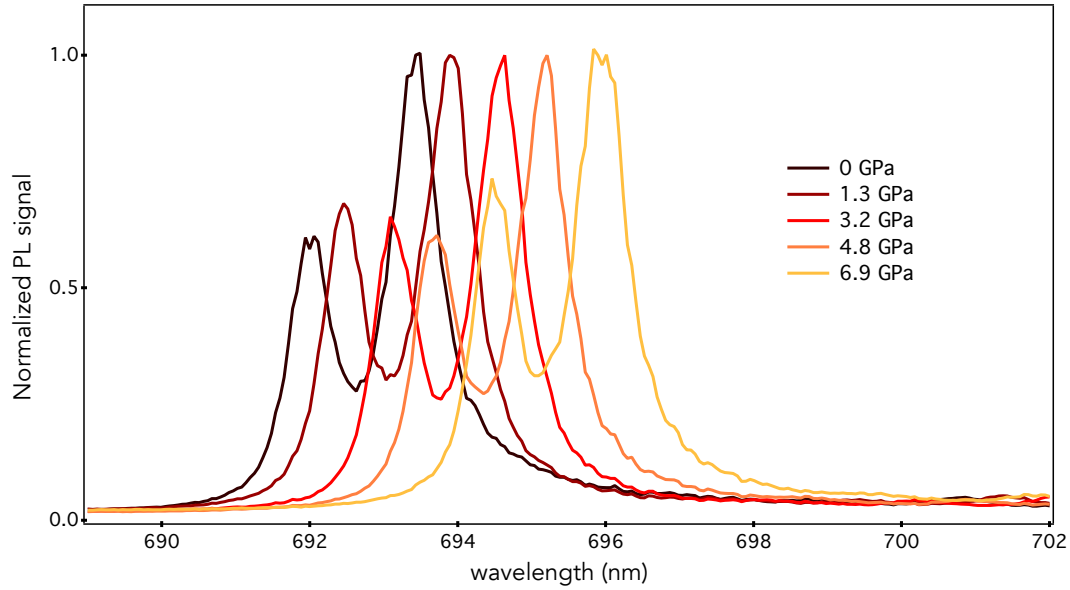

**Supplementary Figure 1.** Typical emission spectra of a ruby microcrystal loaded inside the high-pressure chamber of the DAC. The shift of the emission peaks is used to calibrate the pressure. The emission lines are not broadened in the considered pressure range, which indicates a quasi-hydrostatic pressure environment. For these measurements, NaCl was used as pressure transmission medium. Similar results were obtained for Daphne oil 7373.

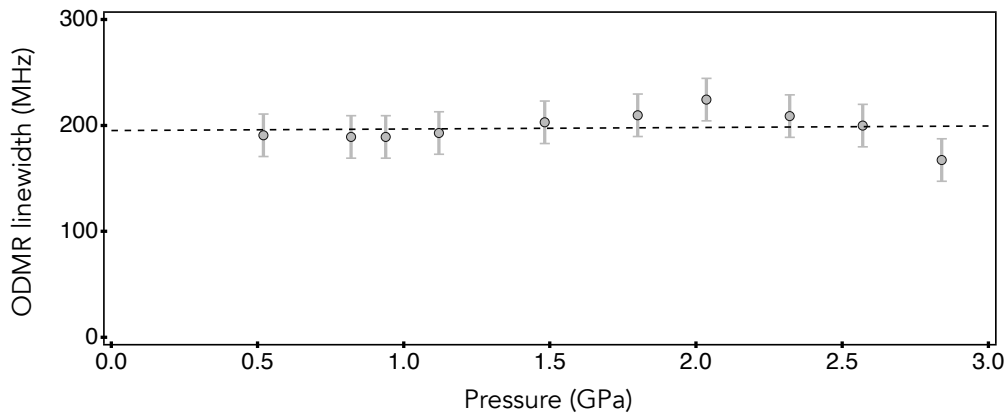

**Supplementary Figure 2.** Pressure-dependent ODMR linewidth (FWHM) obtained for the set of data used in Figure 3 of the main manuscript. The error bars correspond to one standard error in the fitting of ODMR spectra with Lorentzian functions.

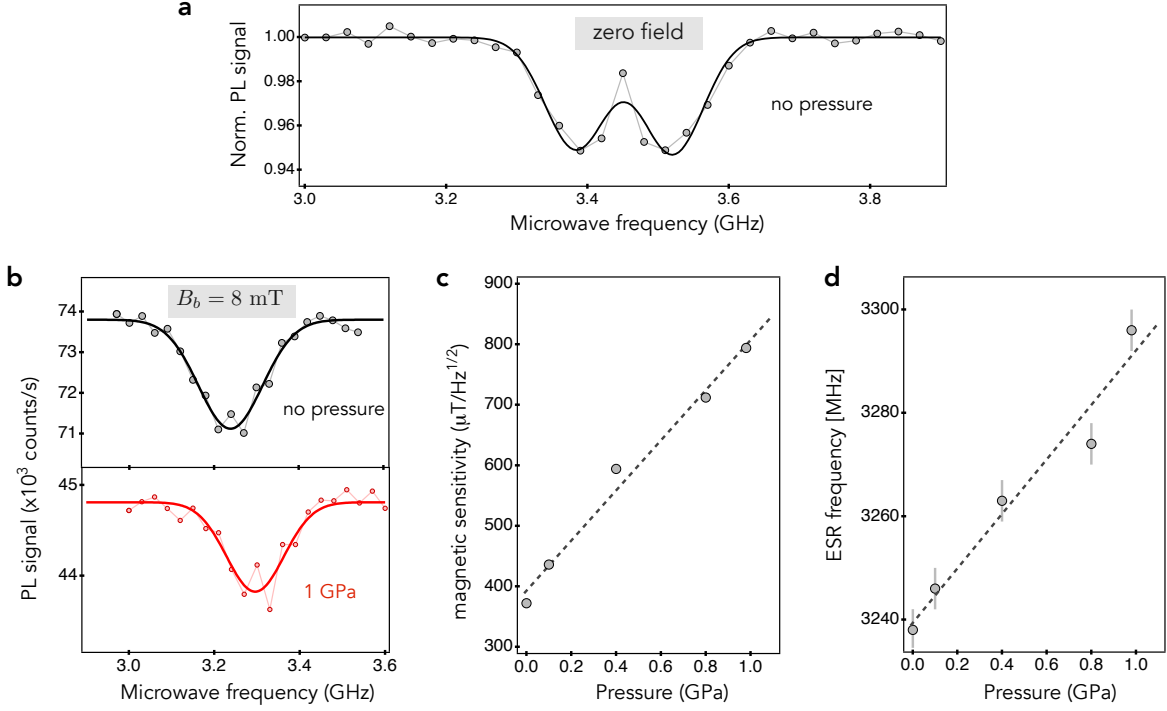

**Supplementary Figure 3.** Characterization of the hBN sensing layer used for magnetic imaging of micrometer-sized  $\text{CrTe}_2$  flakes. (a) Typical ODMR spectrum recorded at zero magnetic field from a hBN flake used for magnetic imaging experiment. This flake was exfoliated from a bulk hBN crystal isotopically purified with  $^{15}\text{N}$ , which has been irradiated by thermal neutrons with a dose of  $\sim 1.4 \times 10^{17}$  neutrons/ $\text{cm}^2$  (see Methods). Data fitting with Gaussian functions leads to an orthorhombic splitting  $E = 60(2)$  MHz. This value is smaller than that shown in Figure 2 of the main manuscript ( $E \sim 100$  MHz), which was obtained from measurements performed on another hBN crystal irradiated with a higher neutron dose ( $\sim 2.6 \times 10^{17}$  neutrons/ $\text{cm}^2$ ). (b) Spectra of the low-frequency magnetic resonance ( $\nu_-$ ) of the  $\text{V}_{\text{B}}^-$  center recorded far from the  $\text{CrTe}_2$  flake at two different pressures with a bias field  $B_b = 8$  mT. The solid lines are data fitting with a Gaussian function. (c) Magnetic field sensitivity as a function pressure. (d) Magnetic resonance frequency  $\nu_-$  as a function of pressure. The black dashed line is a linear fit of the data from which we extract  $\alpha = 52 \pm 6$  MHz/GPa. The error bars correspond to one standard error in the fitting of ODMR spectra with a Gaussian function.

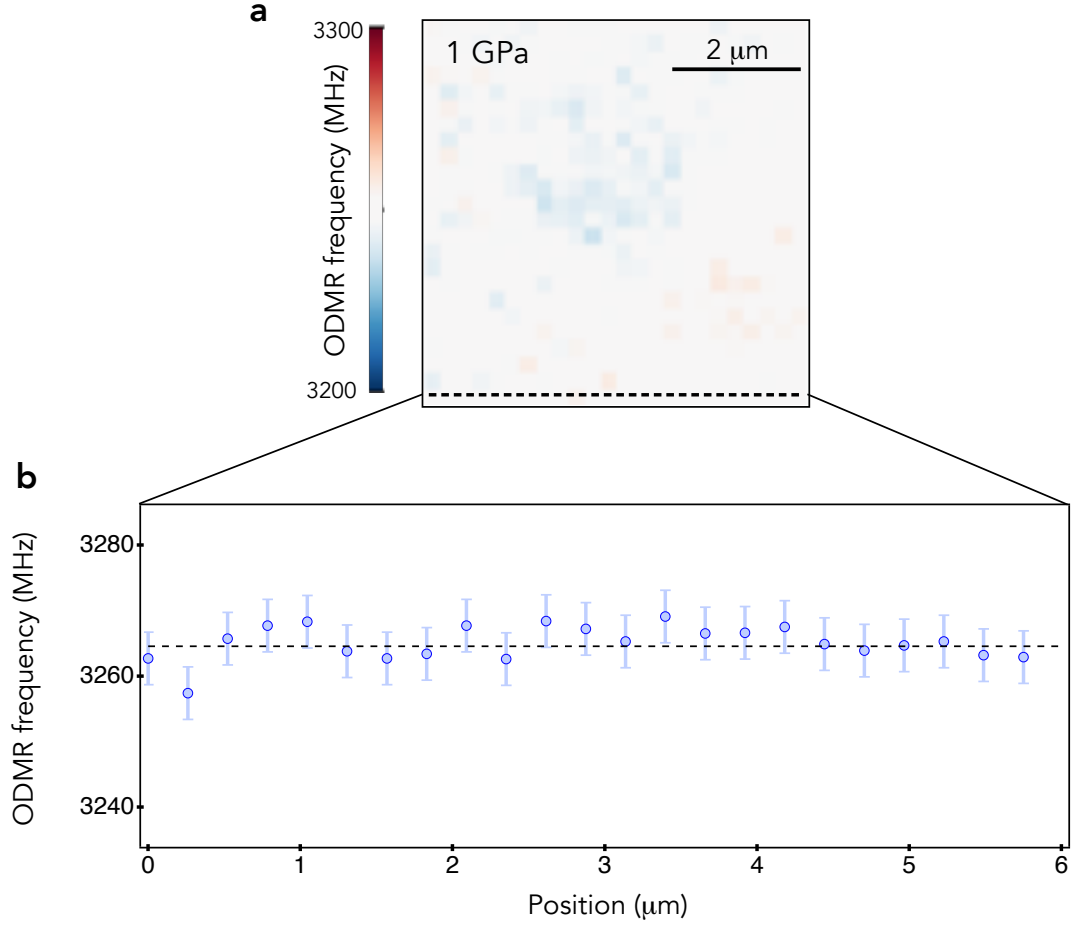

**Supplementary Figure 4.** (a) Map of the ODMR frequency recorded at 1 GPa for the second hBN/CrTe<sub>2</sub>/hBN heterostructure. This map corresponds to that shown in Figure 5c of the main text. (b) Linecut of the ODMR map along the black dashed line in (a), showing a typical variation of the ODMR frequency by  $\sim 5$  MHz that corresponds to the pixel-to-pixel noise in our images. We can thus conclude that our measurements do not reveal a significant spatial gradient of the in-plane stress component on a length scale of about 5  $\mu\text{m}$ . The error bars correspond to one standard error in the fitting of ODMR spectra.

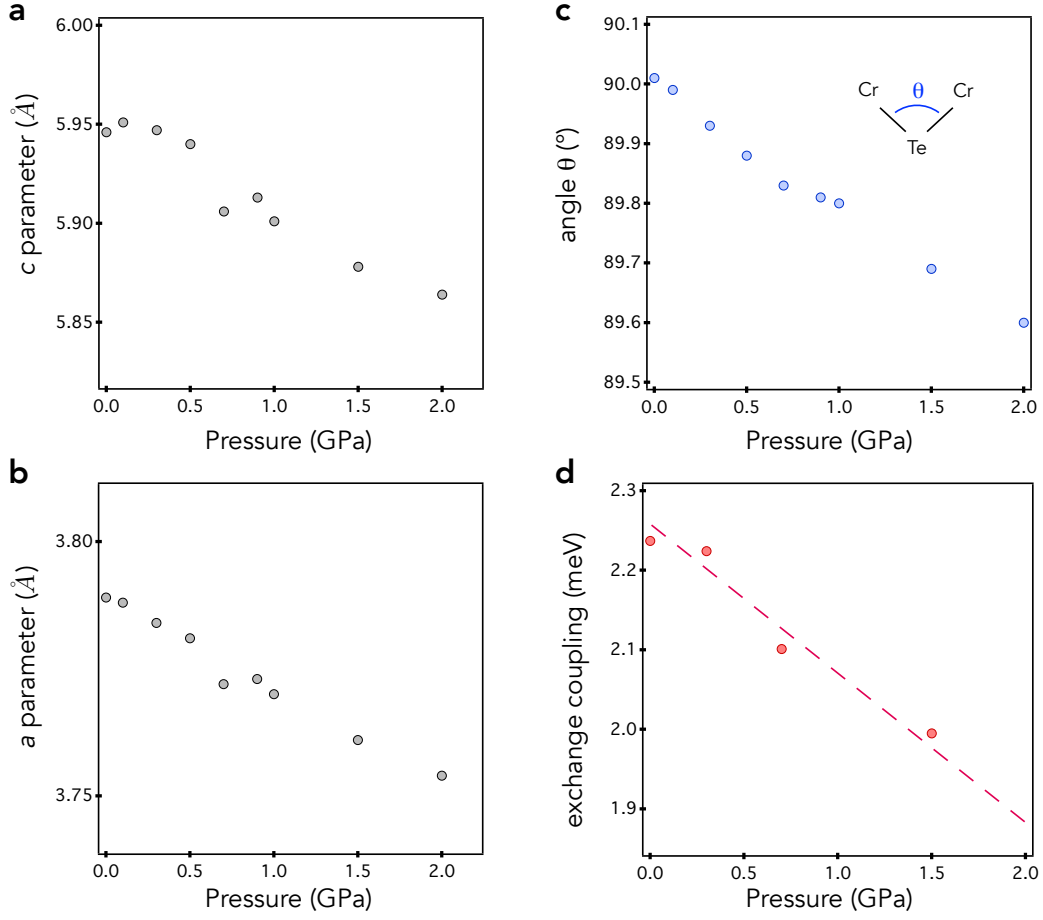

**Supplementary Figure 5.** Results of first-principles calculations. (a,b) Lattice constants  $c$  (top panel) and  $a$  (bottom panel) of CrTe<sub>2</sub> as a function of pressure. (c) Evolution of the Cr-Te-Cr bound angle  $\theta$  with pressure. (d) Effective exchange coupling parameter as a function of pressure.
